# Supplementary figures and images for: Human cytomegalovirus IE1 protein alters the higher-order chromatin structure by targeting the acidic patch of the nucleosome
Source: eLife journal article supplement (doi:10.7554/elife.11911), 2016-01-26

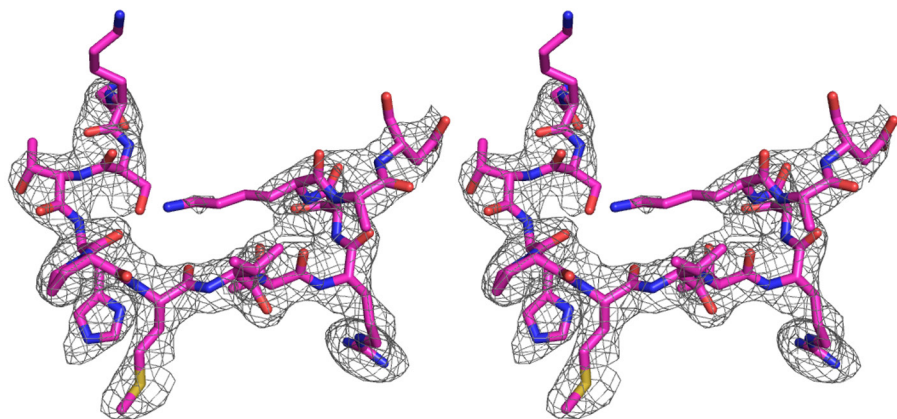

Supplement: supp [file elife_poa_e11911_Figure_1_figure_supplement_1.pdf › elife_poa_e11911_Figure_1_figure_supplement_1.pdf]

**A**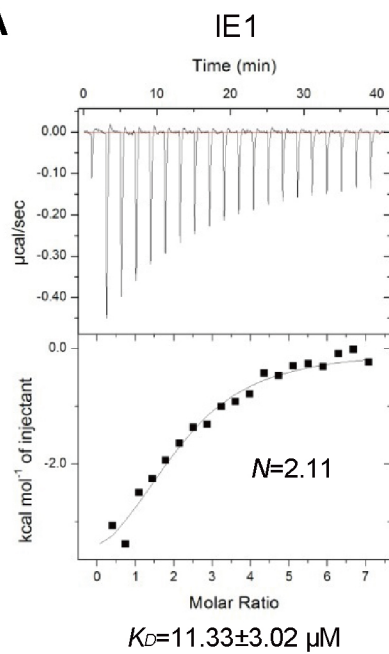**B**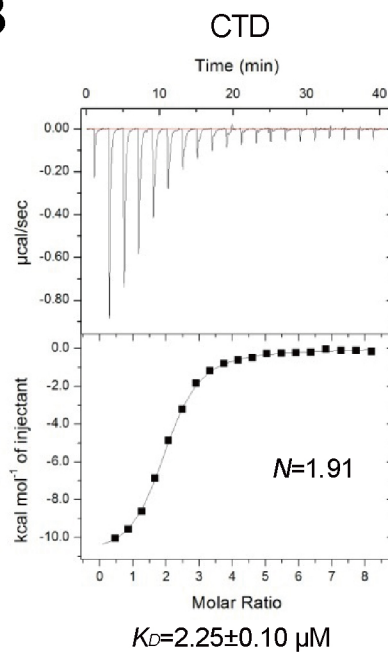**C**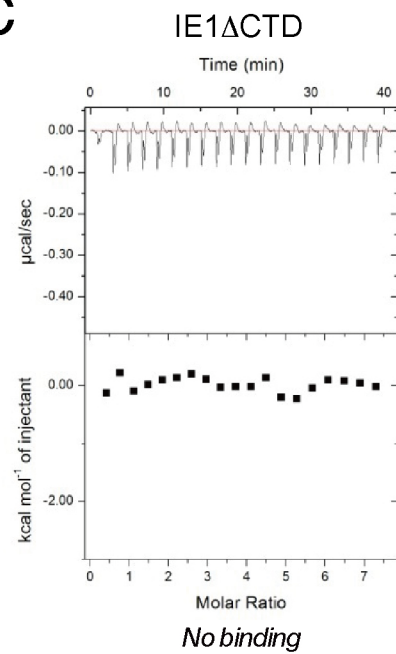

Supplement: supp [file elife_poa_e11911_Figure_3_figure_supplement_1.pdf › elife_poa_e11911_Figure_3_figure_supplement_1.pdf]

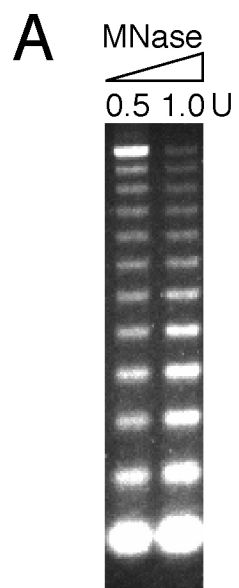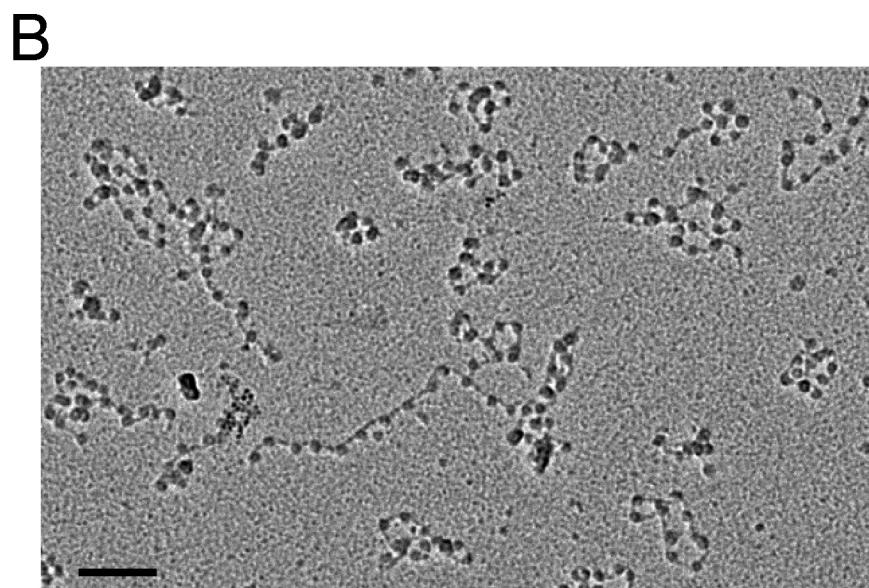

Supplement: supp [file elife_poa_e11911_Figure_4_figure_supplement_1.pdf › elife_poa_e11911_Figure_4_figure_supplement_1.pdf]
